# Supplementary material for: Oxidative Stress as a Simple Tool to Measure Environmental Pollution Impact on Honeybee
Source: Preprints.org preprint supplement (doi:10.20944/preprints202310.0295.v1), 2023-10-06
Supplement: Supplementary file 1 [file supplementary]

**Additional Information**

Table S1 Concentrations (ng/mL) of the 20 PAHs compounds dissolved in sugar syrup

| **ID LABERCA** | **PHE** | **AN** | **FA** | **PY** | **BcF** | **BaA** | **CPP** | **CHR** | **5-MCH** | **BbF** | **BjF** | **BkF** | **BaP** | **IP** | **DbahA** | **BghiP** | **DbaIP** | **DbaeP** | **DbaiP** | **DbahP** |
| --- | --- | --- | --- | --- | --- | --- | --- | --- | --- | --- | --- | --- | --- | --- | --- | --- | --- | --- | --- | --- |
| Control 1 | < 7,22 | < 1,54 | < 1,45 | < 1,48 | < 0,10 | < 0,14 | < 0,16 | < 0,17 | < 0,32 | < 0,21 | < 0,09 | < 0,14 | < 0,57 | < 0,10 | < 0,41 | < 0,07 | < 0,20 | < 0,31 | < 0,20 | < 0,20 |
| Control 2 | < 7,22 | < 1,54 | < 1,45 | < 1,48 | < 0,10 | < 0,14 | < 0,16 | < 0,17 | < 0,32 | < 0,21 | < 0,09 | < 0,14 | < 0,57 | < 0,10 | < 0,41 | < 0,07 | < 0,20 | < 0,31 | < 0,20 | < 0,20 |
| Nsp1 | 372 | 340 | 369 | 355 | < 0,10 | 324 | < 0,16 | 298 | < 0,32 | 281 | < 0,09 | 281 | 264 | 210 | 198 | 194 | < 0,20 | < 0,31 | < 0,20 | < 0,20 |
| Nsp2 | 392 | 370 | 387 | 370 | < 0,10 | 354 | < 0,16 | 334 | < 0,32 | 307 | < 0,09 | 320 | 300 | 241 | 230 | 225 | < 0,20 | < 0,31 | < 0,20 | < 0,20 |
| Nsp3 | 397 | 376 | 405 | 386 | < 0,10 | 386 | < 0,16 | 367 | < 0,32 | 329 | < 0,09 | 363 | 332 | 269 | 257 | 246 | < 0,20 | < 0,31 | < 0,20 | < 0,20 |
| Nsp4 | 381 | 344 | 370 | 361 | < 0,10 | 326 | < 0,16 | 302 | < 0,32 | 275 | < 0,09 | 288 | 268 | 210 | 202 | 193 | < 0,20 | < 0,31 | < 0,20 | < 0,20 |
| Nsp5 | 378 | 341 | 382 | 364 | < 0,10 | 340 | < 0,16 | 316 | < 0,32 | 295 | < 0,09 | 305 | 285 | 231 | 217 | 210 | < 0,20 | < 0,31 | < 0,20 | < 0,20 |
| Nsp6 | 341 | 317 | 341 | 330 | < 0,10 | 302 | < 0,16 | 273 | < 0,32 | 254 | < 0,09 | 258 | 242 | 194 | 188 | 176 | < 0,20 | < 0,31 | < 0,20 | < 0,20 |
| Mean Nsp | 377 | 348 | 376 | 361 | < 0,10 | 339 | < 0,16 | 315 | < 0,32 | 290 | < 0,09 | 303 | 282 | 226 | 215 | 207 | < 0,20 | < 0,31 | < 0,20 | < 0,20 |

Benzo[a]Pyrene (BaP), Benzo[a]Anthracene (BaA), Benzo[b]Fluoranthene (BbF), Benzo[j]Fluoranthene (BjF), Benzo[k]Fluoranthene (BkF), Indeno[1,2,3,c-d]Pyrene (IP), Dibenz[a-h]Anthracene (DbahA), Chrysene (Chr), Phenanthrene (Phe), Anthracene (An), Fluoranthene (Flu), Pyrene (Py), Benzo[c]Fluorene (BcF), Cyclopenta[c-d]Pyrene (CPP), 5-Methylchrysene (5-MCH), BghiP, Dibenzo[a-l]Pyrene (DbalP), Dibenzo[a-e]Pyrene (DbaeP), Dibenzo[a-i]Pyrene (DbaiP), Dibenzo[a-h]Pyrene (DbahP).
